# Supplementary material for: Safety and Suitability of Infant Formula Manufactured from Extensively Hydrolyzed Whey Protein Compared to Intact Protein: A Combined Analysis of Two Randomized Controlled Studies
Source: MDPI journal article supplement (doi:10.3390/nu16020245), 2024-01-12
Supplement: s1 [file s1]

# Safety and Suitability of Infant Formula Manufactured from Extensively Hydrolyzed Whey Protein Compared to Intact Protein: A Combined Analysis of Two Randomized Controlled Studies

Supplementary material

**Table S1.** Nutritional characteristics of the formulas.

|                                    | extensive hydrolysate                                                                                   |            | intact protein |                |
|------------------------------------|---------------------------------------------------------------------------------------------------------|------------|----------------|----------------|
|                                    | eHF**                                                                                                   | LPeHF+Syn* | iPF            | LPiPF          |
| Energy [kcal/ 100 mL]              | 67                                                                                                      | 67         | 67             | 67             |
| Protein                            | 2.3                                                                                                     | 1.9        | 2.2            | 1.89           |
| Degree of hydrolysis               | 23-29%                                                                                                  |            | Intact protein | Intact protein |
|                                    | > 6.000 Dalton: < 0.1<br>3.500-6.000 Dalton: ~0.4<br>1.500-3.500 Dalton: ~12.7<br>< 1.500 Dalton: ~86.8 |            | --             | --             |
| Carbohydrates <sup>1</sup>         | 10.6                                                                                                    | 10.7       | 12.0           | 11.4           |
| Fat                                | 5.4                                                                                                     | 5.4        | 4.9            | 5.3            |
| GOS [g/ 100 mL]                    | --                                                                                                      | 0.3        | --             | --             |
| L. fermentum [cfu/g] at production | --                                                                                                      | 107        | --             | --             |

Values are expressed as [g/ 100 kcal] unless otherwise indicated. All values refer to raw materials. Due to technological processes and differences in raw material, values might not exactly reflect reference values given in correspondent directive. <sup>1</sup> Lactose is the only carbohydrate source in all infant formulae. eHF - infant formula manufactured from extensively hydrolysed protein (2.3 g protein/100kcal), iPF – infant formula manufactured from intact protein (2.2 g protein/100kcal), LPeHF+Syn - low protein infant formula manufactured from extensively hydrolysed protein with synbiotics (1.9 g protein/100kcal), LPiPF - low protein infant formula with manufactured from intact protein (1.9 g protein/100kcal).

**Table S2.** Retrospective sample size calculation.

| <b>Assumptions</b>                             | <b>Step 1<br/>eHF vs. iPF</b> |      | <b>Step 2<br/>LPeHF+Syn vs. LPiPF</b> |      |
|------------------------------------------------|-------------------------------|------|---------------------------------------|------|
|                                                | PPS                           | FAS  | PPS                                   | FAS  |
| Power                                          | 80%                           | 80%  | 80%                                   | 80%  |
| Significance level                             | 2.5%                          | 2.5% | 2.5%                                  | 2.5% |
| Difference between groups (g/day) <sup>1</sup> | -0.3                          | 0.1  | 0.8                                   | 0.4  |
| Pooled standard deviation (g/day)              | 6.56                          | 6.10 | 6.16                                  | 6.73 |
| Evaluable participants needed                  | 94                            | 62   | 43                                    | 63   |

<sup>1</sup> Differences were derived from average daily weight gain between 4 months and 1 month of life in respective formula groups based on the HA study [16] and BeMIM [17] study. Non-inferiority margin -3.0 g/day. eHF = infant formula manufactured from extensively hydrolyzed protein (2.3 g protein/100 kcal), FAS = full analysis set, iPF = infant formula manufactured from intact protein (2.2 g protein/100 kcal), LPeHF+Syn = low protein infant formula manufactured from extensively hydrolyzed protein with synbiotics (1.9 g protein/100 kcal), LPiPF = low protein infant formula manufactured from intact protein (1.9 g protein/100 kcal), PPS = per-protocol set.

**Table S3.** Baseline characteristics of study participants (FAS).

| FAS (n=549)                                              | eHF<br>n=86            | iPF<br>n=89            | LPeHF+Syn<br>n=83      | LPiPF<br>n=88          | BF<br>n=203            |
|----------------------------------------------------------|------------------------|------------------------|------------------------|------------------------|------------------------|
|                                                          | n (%)                  |
| <b>Maternal education</b>                                |                        |                        |                        |                        |                        |
| Basic                                                    | 39 (45.4) *            | 7 (7.9) *              | 44 (53.0)              | 5 (5.7)                | 17 (8.4)               |
| Additional                                               | 37 (43.0) *            | 57 (64.0) *            | 30 (36.1)              | 58 (65.9)              | 87 (42.9)              |
| Tertiary                                                 | 10 (11.6) *            | 25 (28.1) *            | 9 (10.8)               | 25 (28.4)              | 99 (48.8)              |
| <b>Region</b>                                            |                        |                        |                        |                        |                        |
| Central Europe                                           | 67 (77.9)              | 0 (0.0)                | 46 (55.4)              | 0 (0.0)                | 95 (46.8)              |
| South-Eastern Europe                                     | 19 (22.1)              | 89 (100.0)             | 37 (44.6)              | 88 (100.0)             | 108 (53.2)             |
| <b>Male sex</b>                                          | 39 (45.4)              | 45 (50.6)              | 39 (47.0)              | 43 (48.9)              | 104 (51.2)             |
| <b>Mode of delivery (spontaneous)</b>                    | 52 (60.5)              | 58 (65.2)              | 42 (50.6)              | 58 (65.9)              | 150 (73.9)             |
| <b>First child (yes)</b>                                 | 23 (26.7)              | 51 (57.3)              | 36 (43.4)              | 53 (60.2)              | 120 (59.1)             |
| <b>Mother smoking before pregnancy</b>                   | 38 (44.2)              | 44 (49.4)              | 34 (41.0)              | 46 (52.3)              | 63 (31.0)              |
| <b>Mother smoking during pregnancy</b>                   | 22 (25.6)              | 27 (30.3)              | 19 (22.9)              | 24 (27.3)              | 28 (13.8)              |
|                                                          | Mean±SD                | Mean±SD                | Mean±SD                | Mean±SD                | Mean±SD                |
| <b>Age at randomisation/ allocation (days)</b>           | 7.7±8.31               | 17.2±8.03              | 9.7±7.86               | 17.9±7.74              | 9.3±9.89               |
| <b>Birth weight (g)</b>                                  | 3309.9±387.47          | 3489.1±406.92          | 3353.8±428.97          | 3380.9±382.26          | 3443.0±374.71          |
| <b>Birth length (cm)</b>                                 | 50.9±1.94              | 51.7±1.82              | 51.3±2.33              | 51.3±1.94              | 51.7±1.89              |
| <b>Birth head circumference (cm)</b>                     | 34.9±1.31              | 35.3±1.12              | 34.8±1.36              | 34.9±1.12              | 35.2±1.29              |
| <b>Age mother (years)</b>                                | 30.6±4.59              | 30.4±5.60              | 31.0±5.54              | 30.5±5.41              | 30.7±4.74              |
| <b>Maternal weight gain during pregnancy (kg)</b>        | 14.5±8.76              | 15.3±6.65              | 15.3±8.58              | 16.0±6.46 <sup>2</sup> | 15.4±5.63              |
| <b>BMI mother by before pregnancy (kg/m<sup>2</sup>)</b> | 25.0±6.00              | 22.2±3.21 <sup>7</sup> | 23.3±5.12              | 22.1±3.19              | 22.3±3.90              |
| <b>Age father (years)</b>                                | 33.4±5.43 <sup>1</sup> | <sup>8</sup>           | 34.6±7.92 <sup>3</sup> | <sup>8</sup>           | 34.9±6.21 <sup>5</sup> |
| <b>BMI father before pregnancy (kg/m<sup>2</sup>)</b>    | 26.9±6.98              | 26.3±3.2 <sup>4</sup>  | 26.0±3.79 <sup>3</sup> | 26.9±4.33 <sup>4</sup> | 26.2±4.11 <sup>6</sup> |

Group differences (eHF vs iPF and LPeHF+Syn vs LPiPF) were tested with a Cochran-Mantel-Haenszel test adjusted for region (categorical parameters) or a vanElteren test adjusted for region (continuous data). Descriptive statistics are based on non-missing data. BF = breastfeeding; BMI = body mass index; eHF = infant formula manufactured from extensively hydrolyzed protein; iPF = infant formula manufactured from intact protein; LPeHF+Syn = low protein infant formula manufactured from extensively hydrolyzed protein with synbiotics; LPiPF = low protein infant formula manufactured from intact protein; SD = Standard deviation. <sup>1</sup> n=83. <sup>2</sup> n=84. <sup>3</sup> n=77. <sup>4</sup> n=86. <sup>5</sup> n=92. <sup>6</sup> n=197. <sup>7</sup> n=87. <sup>8</sup> Data not collected.

\**p* < 0.05 (2-sided).

**Table S4.** Average weight gain, length, and head circumference between month 1 and month 4 (FAS and PPS).

|                                  | eHF |       |         |    | iPF   |         |   |        | eHF vs iPF          |        |                      | LPeHF+Syn |         |    |       | LPiPF   |        |                |        | LPeHF+Syn vs LPiPF  |        |                      | BF |      |   |    |
|----------------------------------|-----|-------|---------|----|-------|---------|---|--------|---------------------|--------|----------------------|-----------|---------|----|-------|---------|--------|----------------|--------|---------------------|--------|----------------------|----|------|---|----|
|                                  | n   | Mean  | ±       | SD | n     | Mean    | ± | SD     | LSMean <sup>2</sup> | 95% CI | p-value <sup>2</sup> | n         | Mean    | ±  | SD    | n       | Mean   | ±              | SD     | LSMean <sup>2</sup> | 95% CI | p-value <sup>2</sup> | n  | Mean | ± | SD |
| FAS                              |     |       |         |    |       |         |   |        |                     |        |                      |           |         |    |       |         |        |                |        |                     |        |                      |    |      |   |    |
| Weight gain (g/day) <sup>1</sup> | 71  | 28.44 | ± 5.622 | 80 | 28.03 | ± 6.267 |   | 2.2157 | [-0.807,5.238]      | 0.1495 | 69                   | 30.60     | ± 7.155 | 84 | 30.47 | ± 6.579 | 0.2784 | [-2.344,2.901] | 0.8341 | 174                 | 26.24  | ± 6.092              |    |      |   |    |
| Length gain (mm/day)             | 71  | 1.13  | ± 0.217 | 80 | 0.99  | ± 0.170 |   | 0.1058 | [0.009,0.203]       | 0.0325 | 69                   | 1.15      | ± 0.195 | 84 | 1.06  | ± 0.171 | 0.0479 | [-0.021,0.117] | 0.1702 | 174                 | 0.99   | ± 0.173              |    |      |   |    |
| Head circumference gain (mm/day) | 71  | 0.50  | ± 0.086 | 80 | 0.49  | ± 0.109 |   | 0.0398 | [-0.007,0.087]      | 0.0954 | 69                   | 0.54      | ± 0.120 | 84 | 0.49  | ± 0.104 | 0.0637 | [0.024,0.103]  | 0.0019 | 174                 | 0.49   | ± 0.128              |    |      |   |    |
| PPS                              |     |       |         |    |       |         |   |        |                     |        |                      |           |         |    |       |         |        |                |        |                     |        |                      |    |      |   |    |
| Weight gain (g/day) <sup>1</sup> | 39  | 29.03 | ± 5.165 | 42 | 28.45 | ± 6.649 |   | 0.7294 | [-3.029,4.488]      | 0.7002 | 54                   | 31.32     | ± 6.509 | 49 | 29.52 | ± 5.707 | 1.3921 | [-1.321,4.105] | 0.3111 | 115                 | 26.28  | ± 6.149              |    |      |   |    |
| Length gain (mm/day)             | 39  | 1.11  | ± 0.184 | 42 | 0.99  | ± 0.158 |   | 0.0720 | [-0.027,0.171]      | 0.1524 | 54                   | 1.17      | ± 0.188 | 49 | 1.06  | ± 0.162 | 0.0584 | [-0.016,0.133] | 0.1247 | 115                 | 0.99   | ± 0.183              |    |      |   |    |
| Head circumference gain (mm/day) | 39  | 0.50  | ± 0.079 | 42 | 0.49  | ± 0.119 |   | 0.0323 | [-0.027,0.092]      | 0.2821 | 54                   | 0.54      | ± 0.124 | 49 | 0.50  | ± 0.108 | 0.0543 | [0.009,0.100]  | 0.0192 | 115                 | 0.49   | ± 0.127              |    |      |   |    |

<sup>1</sup>Daily gain defined as difference between month 4 and 1 divided by days in between. <sup>2</sup> Analysis of covariance adjusted for sex, region, baseline value at the age of 1 month. 2-sided p-values based on superiority testing at 5% significance level (not adjusted for multiple testing). LSMean: estimated least square mean difference between formula groups (eHF – iPF, LPeHF+Syn – LPiPF), 95% CI: 95% confidence interval of estimated least square mean difference between formula groups (eHF – iPF, LPeHF+Syn – LPiPF)

**Table S5.** Weight-for-age and BMI-for-age z-scores – MMRM (FAS and PPS).

| Weight-for-age<br>z-score | eHF             | iPF             | eHF vs iPF           |                  |                      | LPeHF+Syn       | LPiPF           | LPeHF+Syn vs LPiPF   |                  |                      |
|---------------------------|-----------------|-----------------|----------------------|------------------|----------------------|-----------------|-----------------|----------------------|------------------|----------------------|
|                           | LSMean<br>(SEM) | LSMean<br>(SEM) | LSMean<br>Difference | 95% CI           | p-value <sup>1</sup> | LSMean<br>(SEM) | LSMean<br>(SEM) | LSMean<br>Difference | 95% CI           | p-value <sup>1</sup> |
| <b>FAS</b>                |                 |                 |                      |                  |                      |                 |                 |                      |                  |                      |
| Model 1                   | -0.174 (0.0929) | -0.253 (0.1201) | 0.079                | [-0.2784;0.4354] | 0.6646               | -0.034 (0.0877) | 0.020 (0.1184)  | -0.054               | [-0.3540;0.2466] | 0.7244               |
| Model 2                   | -0.114 (0.0788) | -0.287 (0.0985) | 0.173                | [-0.1032;0.4500] | 0.2174               | 0.032 (0.0752)  | -0.051 (0.0863) | 0.084                | [-0.1406;0.3076] | 0.4630               |
| <b>PPS</b>                |                 |                 |                      |                  |                      |                 |                 |                      |                  |                      |
| Model 1                   | -0.174 (0.1213) | -0.234 (0.1660) | 0.060                | [-0.3965;0.5165] | 0.7943               | 0.051 (0.0973)  | 0.045 (0.1402)  | 0.006                | [-0.3202;0.3320] | 0.9714               |
| Model 2                   | -0.111 (0.1028) | -0.084 (0.1365) | -0.027               | [-0.3773;0.3232] | 0.8781               | 0.152 (0.0880)  | -0.034 (0.1051) | 0.186                | [-0.0656;0.4379] | 0.1455               |

| BMI-for-age<br>z-score | eHF             | iPF             | eHF vs iPF           |                  |                      | LPeHF+Syn       | LPiPF           | LPeHF+Syn vs LPiPF   |                  |                      |
|------------------------|-----------------|-----------------|----------------------|------------------|----------------------|-----------------|-----------------|----------------------|------------------|----------------------|
|                        | LSMean<br>(SEM) | LSMean<br>(SEM) | LSMean<br>Difference | 95% CI           | p-value <sup>1</sup> | LSMean<br>(SEM) | LSMean<br>(SEM) | LSMean<br>Difference | 95% CI           | p-value <sup>1</sup> |
| <b>FAS</b>             |                 |                 |                      |                  |                      |                 |                 |                      |                  |                      |
| Model 1                | -0.514 (0.1017) | -0.648 (0.1289) | 0.134                | [-0.2488;0.5159] | 0.4916               | -0.464 (0.0865) | -0.218 (0.1157) | -0.247               | [-0.5403;0.0469] | 0.0990               |
| Model 2                | -0.454 (0.1090) | -0.731 (0.1376) | 0.277                | [-0.1126;0.6662] | 0.1623               | -0.303 (0.1002) | -0.272 (0.1170) | -0.032               | [-0.3332;0.2699] | 0.8361               |
| <b>PPS</b>             |                 |                 |                      |                  |                      |                 |                 |                      |                  |                      |
| Model 1                | -0.385 (0.1322) | -0.519 (0.1755) | 0.134                | [-0.3495;0.6173] | 0.5832               | -0.344 (0.0979) | -0.245 (0.1408) | -0.099               | [-0.4265;0.2293] | 0.5523               |
| Model 2                | -0.327 (0.1565) | -0.386 (0.2087) | 0.060                | [-0.4807;0.6005] | 0.8257               | -0.178 (0.1296) | -0.328 (0.1562) | 0.151                | [-0.2177;0.5189] | 0.4187               |

Model 1: fixed factors formula group, visit, interaction term formula group and visit, region, random factor subject.

Model 2: fixed factors formula group, visit, interaction term formula group and visit, region, random factor subject, additional covariates: maternal age at infant's birth (years), BMI at screening (kg/m<sup>2</sup>) (mother), weight-for-age z-score (at birth) or BMI-for age z-score (at birth), maternal education (socioeconomic status), gestational age, smoking status of mother before pregnancy, smoking status of mother during pregnancy.

<sup>1</sup>p-value from two-sided superiority testing.

LSMean = Least squares estimation of mean derived from mixed model with repeated measurements (MMRM), SEM = estimated standard error of the mean.

Visit and z-score at birth have shown to be significantly important in explaining overall weight or BMI development, however no model showed a significant difference between formula groups over time in weight-for-age or BMI-for-age z-scores.

**Table S6.** Intake of study formula, other infant formula, energy containing liquids, and complementary food between month 1 and month 4 (FAS).

| FAS                                          |                 | eHF |       |   |        | iPF |       |   |        | LPeHF+Syn |       |   |         | LPiPF |        |   |        | BF  |      |   |        |
|----------------------------------------------|-----------------|-----|-------|---|--------|-----|-------|---|--------|-----------|-------|---|---------|-------|--------|---|--------|-----|------|---|--------|
|                                              | Age             | n   | Mean  | ± | SD     | n   | Mean  | ± | SD     | n         | Mean  | ± | SD      | n     | Mean   | ± | SD     | n   | Mean | ± | SD     |
| <b>Formula intake</b>                        |                 |     |       |   |        |     |       |   |        |           |       |   |         |       |        |   |        |     |      |   |        |
| Average amount (mL)/day                      | 1 month         | 83  | 665.9 | ± | 156.46 | 86  | 628.6 | ± | 225.75 | 83        | 682.4 | ± | 191.37  | 86    | 636.00 | ± | 186.33 | 0   |      |   |        |
|                                              | 2 months        | 75  | 772.4 | ± | 212.78 | 82  | 762.9 | ± | 223.10 | 74        | 767.5 | ± | 181.633 | 85    | 753.00 | ± | 203.98 | 0   |      |   |        |
|                                              | 3 months        | 72  | 825.5 | ± | 206.70 | 80  | 844.8 | ± | 225.29 | 68        | 788.1 | ± | 174.00  | 84    | 765.80 | ± | 177.50 | 0   |      |   |        |
|                                              | 4 months        | 71  | 890.5 | ± | 179.33 | 80  | 917.1 | ± | 254.53 | 68        | 864.9 | ± | 177.44  | 83    | 792.57 | ± | 185.09 | 0   |      |   |        |
| Average energy (kcal)/day                    | 1 month         | 83  | 446.2 | ± | 104.83 | 86  | 421.2 | ± | 151.25 | 83        | 457.2 | ± | 128.22  | 86    | 426.1  | ± | 124.84 | *   | 0    |   |        |
|                                              | 2 months        | 75  | 517.5 | ± | 142.56 | 82  | 511.1 | ± | 149.48 | 74        | 514.2 | ± | 121.69  | 85    | 504.5  | ± | 136.66 | 0   |      |   |        |
|                                              | 3 months        | 72  | 553.1 | ± | 138.49 | 80  | 566.0 | ± | 150.94 | 68        | 528.1 | ± | 116.58  | 84    | 513.1  | ± | 118.93 | 0   |      |   |        |
|                                              | 4 months        | 71  | 596.7 | ± | 120.15 | 80  | 614.5 | ± | 170.54 | 68        | 579.5 | ± | 118.88  | 83    | 531.0  | ± | 124.01 | *   | 0    |   |        |
| <b>Breastfeeding</b>                         |                 |     |       |   |        |     |       |   |        |           |       |   |         |       |        |   |        |     |      |   |        |
| Average number of breastfeedings per day     | 1 month         | 8   | 4.08  | ± | 2.730  | 38  | 2.42  | ± | 1.840  | 5         | 2.07  | ± | 1.256   | 38    | 2.37   | ± | 2.432  | 201 | 8.06 | ± | 1.595  |
|                                              | 2 months        | 2   | 1.33  | ± | 0.471  | 14  | 2.79  | ± | 1.968  | 3         | 3.89  | ± | 2.219   | 14    | 2.29   | ± | 2.585  | 184 | 7.41 | ± | 1.761  |
|                                              | 3 months        | 1   | 0.67  |   |        | 10  | 2.40  | ± | 2.066  | 1         | 5.67  |   |         | 7     | 2.57   | ± | 2.820  | 178 | 7.02 | ± | 1.697  |
|                                              | 4 months        | 0   |       |   |        | 7   | 3.43  | ± | 2.440  | 1         | 6.00  |   |         | 5     | 3.20   | ± | 3.194  | 172 | 6.77 | ± | 1.726  |
| <b>Energy containing liquid intake</b>       |                 |     |       |   |        |     |       |   |        |           |       |   |         |       |        |   |        |     |      |   |        |
| Average amount (mL)/day                      | 1 month         | 2   | 87.5  | ± | 88.39  | 50  | 41.8  | ± | 46.70  | 0         |       |   |         | 53    | 35.7   | ± | 23.33  | 34  | 31.4 | ± | 28.78  |
|                                              | 2 months        | 3   | 83.3  | ± | 14.43  | 51  | 41.8  | ± | 29.22  | 0         |       |   |         | 54    | 33.4   | ± | 23.99  | 34  | 35.1 | ± | 22.91  |
|                                              | 3 months        | 1   | 75.0  |   |        | 39  | 46.7  | ± | 32.61  | 0         |       |   |         | 42    | 45.0   | ± | 49.83  | 30  | 32.1 | ± | 23.85  |
|                                              | 4 months        | 2   | 137.5 | ± | 88.39  | 34  | 28.6  | ± | 19.21  | 1         | 75.0  |   |         | 39    | 42.6   | ± | 29.89  | 23  | 32.9 | ± | 28.16  |
| Average energy (kcal)/day                    | 1 month         | 2   | 13.9  | ± | 12.11  | 50  | 7.0   | ± | 11.29  | 0         |       |   |         | 53    | 5.1    | ± | 3.29   | 34  | 4.4  | ± | 4.03   |
|                                              | 2 months        | 3   | 14.1  | ± | 2.55   | 51  | 5.9   | ± | 4.13   | 0         |       |   |         | 54    | 4.7    | ± | 3.38   | 34  | 5.0  | ± | 3.31   |
|                                              | 3 months        | 1   | 16.1  |   |        | 39  | 6.6   | ± | 4.67   | 0         |       |   |         | 42    | 6.4    | ± | 6.99   | 30  | 4.5  | ± | 3.33   |
|                                              | 4 months        | 2   | 23.1  | ± | 9.81   | 34  | 4.3   | ± | 2.72   | 1         | 16.1  |   |         | 39    | 6.5    | ± | 5.75   | 23  | 6.2  | ± | 6.41   |
| Average liquid amount (mL)/day over 4 months | Over all visits | 5   | 61.25 | ± | 51.615 | 71  | 24.71 | ± | 22.338 | 1         | 18.8  |   |         | 69    | 26.3   | ± | 23.94  | 58  | 17.2 | ± | 15.538 |

For formula intake group differences in energy intake were tested with a vanElteren test adjusted for region (2-sided, continuous parameters). Statistical testing could not be performed for energy containing liquid intake due to the low sample size for data derived from the HA study.

\* p<0.05 for LPeHF+Syn vs LPiPF.

**Table S7.** Intake of study formula, other infant formula, energy containing liquids, and complementary food between month 1 and month 4 (PPS).

| PPS                     |          | eHF |       |   |        | iPF |       |   |        | LPeHF+Syn |       |   |        | LPiPF |       |   |        | BF |      |   |    |
|-------------------------|----------|-----|-------|---|--------|-----|-------|---|--------|-----------|-------|---|--------|-------|-------|---|--------|----|------|---|----|
|                         | Age      | n   | Mean  | ± | SD     | n   | Mean  | ± | SD     | n         | Mean  | ± | SD     | n     | Mean  | ± | SD     | n  | Mean | ± | SD |
| <b>Formula intake</b>   |          |     |       |   |        |     |       |   |        |           |       |   |        |       |       |   |        |    |      |   |    |
| Average amount (mL)/day | 1 month  | 39  | 677.9 | ± | 157.05 | 42  | 698.1 | ± | 200.36 | 54        | 695.8 | ± | 172.56 | 49    | 666.6 | ± | 169.32 | 0  |      |   |    |
|                         | 2 months | 39  | 767.2 | ± | 155.56 | 42  | 812.5 | ± | 193.84 | 54        | 784.3 | ± | 181.45 | 49    | 764.7 | ± | 196.95 | 0  |      |   |    |
|                         | 3 months | 39  | 820.6 | ± | 222.01 | 42  | 887.0 | ± | 211.22 | 54        | 801.9 | ± | 170.75 | 49    | 794.3 | ± | 157.83 | 0  |      |   |    |

|                                                 |                 |    |       |   |        |    |       |   |        |    |       |   |        |    |       |   |        |     |      |   |       |
|-------------------------------------------------|-----------------|----|-------|---|--------|----|-------|---|--------|----|-------|---|--------|----|-------|---|--------|-----|------|---|-------|
| Average energy (kcal)/day                       | 4 months        | 39 | 879.4 | ± | 184.60 | 42 | 953.1 | ± | 215.87 | 54 | 889.9 | ± | 152.85 | 49 | 824.8 | ± | 176.92 | 0   |      |   |       |
|                                                 | 1 month         | 39 | 454.2 | ± | 105.23 | 42 | 467.8 | ± | 134.24 | 54 | 466.2 | ± | 115.61 | 49 | 446.6 | ± | 113.45 | 0   |      |   |       |
|                                                 | 2 months        | 39 | 514.0 | ± | 104.23 | 42 | 544.4 | ± | 129.87 | 54 | 525.5 | ± | 121.57 | 49 | 512.4 | ± | 131.95 | 0   |      |   |       |
|                                                 | 3 months        | 39 | 549.8 | ± | 148.75 | 42 | 594.3 | ± | 141.52 | 54 | 537.2 | ± | 114.40 | 49 | 532.2 | ± | 105.75 | 0   |      |   |       |
|                                                 | 4 months        | 39 | 589.2 | ± | 123.68 | 42 | 638.6 | ± | 144.63 | 54 | 596.3 | ± | 102.41 | 49 | 552.6 | ± | 118.54 | *   | 0    |   |       |
| <b>Breastfeeding</b>                            |                 |    |       |   |        |    |       |   |        |    |       |   |        |    |       |   |        |     |      |   |       |
| Average number of breastfeedings per day        | 1 month         | 0  |       |   |        | 11 | 1.00  | ± | 0.000  | 0  |       |   |        | 17 | 1.00  | ± | 0.000  | 115 | 8.03 | ± | 1.594 |
|                                                 | 2 months        | 0  |       |   |        | 2  | 1.00  | ± | 0.000  | 0  |       |   |        | 4  | 1.00  | ± | 0.000  | 115 | 7.54 | ± | 1.567 |
|                                                 | 3 months        | 0  |       |   |        | 0  |       |   |        | 0  |       |   |        | 1  | 1.00  |   |        | 115 | 7.16 | ± | 1.641 |
|                                                 | 4 months        | 0  |       |   |        | 0  |       |   |        | 0  |       |   |        | 2  | 1.00  | ± | 0.000  | 115 | 7.03 | ± | 1.500 |
| <b>Energy containing liquid intake</b>          |                 |    |       |   |        |    |       |   |        |    |       |   |        |    |       |   |        |     |      |   |       |
| Average amount (mL)/day                         | 1 month         | 1  | 25.0  |   |        | 27 | 37.1  | ± | 30.04  | 0  |       |   |        | 26 | 35.3  | ± | 21.0   | 12  | 28.3 | ± | 27.36 |
|                                                 | 2 months        | 1  | 75.0  |   |        | 22 | 34.0  | ± | 15.84  | 0  |       |   |        | 29 | 25.6  | ± | 13.91  | 12  | 19.6 | ± | 9.93  |
|                                                 | 3 months        | 0  |       |   |        | 18 | 46.7  | ± | 26.81  | 0  |       |   |        | 26 | 33.9  | ± | 26.77  | 11  | 24.7 | ± | 19.38 |
|                                                 | 4 months        | 0  |       |   |        | 15 | 23.8  | ± | 14.43  | 1  | 75.00 |   |        | 22 | 33.0  | ± | 21.09  | 9   | 22.4 | ± | 13.15 |
| Average energy (kcal)/day                       | 1 month         | 1  | 5.4   |   |        | 27 | 5.3   | ± | 4.43   | 0  |       |   |        | 26 | 5.0   | ± | 3.03   | 12  | 4.00 | ± | 3.83  |
|                                                 | 2 months        | 1  | 16.1  |   |        | 22 | 4.8   | ± | 2.33   | 0  |       |   |        | 29 | 3.7   | ± | 2.01   | 12  | 2.8  | ± | 1.41  |
|                                                 | 3 months        | 0  |       |   |        | 18 | 6.7   | ± | 3.98   | 0  |       |   |        | 26 | 4.8   | ± | 3.79   | 11  | 3.5  | ± | 2.71  |
|                                                 | 4 months        | 0  |       |   |        | 15 | 3.5   | ± | 1.97   | 1  | 16.1  |   |        | 22 | 4.9   | ± | 3.01   | 9   | 4.5  | ± | 3.00  |
| Average liquid amount (mL)/day over four months | Over all visits | 1  | 25.0  |   |        | 35 | 21.1  | ± | 14.13  | 1  | 18.8  |   |        | 40 | 20.4  | ± | 12.40  | 23  | 11.4 | ± | 10.36 |

For formula intake group differences in energy intake were tested with a vanElteren test adjusted for region (2-sided, continuous parameters). Statistical testing could not be performed for energy containing liquid intake due to the low sample size for data derived from the HA study.

\* p<0.05 for LPeHF+Syn vs LPiPF.

**Table S8.** Adverse events (FAS).

|                                                      | eHF |    |         | iPF |    |         | LPeHF+Syn |    |         | LPiPF |    |         | BF |    |         |
|------------------------------------------------------|-----|----|---------|-----|----|---------|-----------|----|---------|-------|----|---------|----|----|---------|
|                                                      | n'  | N  | (%)     | n'  | N  | (%)     | n'        | N  | (%)     | n'    | N  | (%)     | n' | N  | (%)     |
| <b>All</b>                                           | 28  | 20 | (23.26) | 36  | 23 | (25.84) | 26        | 19 | (22.89) | 20    | 16 | (18.18) | 61 | 52 | (25.62) |
| <b>Related AEs</b>                                   | 5   | 5  | (5.81)  | 1   | 1  | (1.12)  | 7         | 6  | (7.23)  | -     | -  | -       | 5  | 5  | (2.46)  |
| <b>Serious AEs</b>                                   | 4   | 3  | (3.49)  | 2   | 2  | (2.25)  | 5         | 3  | (3.61)  | 6     | 6  | (6.82)  | 11 | 10 | (4.93)  |
| <b>AEs by SOC</b>                                    |     |    |         |     |    |         |           |    |         |       |    |         |    |    |         |
| Gastrointestinal disorders                           | 5   | 4  | (4.65)  | 6   | 6  | (6.74)  | 1         | 1  | (1.20)  | 1     | 1  | (1.14)  | 3  | 3  | (1.48)  |
| General disorders and administration site conditions | 9   | 7  | (8.14)  | 0   | 0  |         | 5         | 5  | (6.02)  | 1     | 1  | (1.14)  | 6  | 6  | (2.96)  |
| Infections and infestations                          | 5   | 5  | (5.81)  | 24  | 16 | (17.98) | 7         | 6  | (7.23)  | 17    | 14 | (15.91) | 29 | 24 | (11.82) |
| Metabolism and nutrition disorders*                  | 3   | 3  | (3.49)  | -   | -  | -       | 5         | 5  | (6.02)  | -     | -  | -       | 5  | 5  | (2.46)  |
| Skin and subcutaneous tissue disorders               | 5   | 4  | (4.65)  | 6   | 6  | (6.74)  | 3         | 2  | (2.41)  | 1     | 1  | (1.14)  | 12 | 12 | (5.91)  |
| Respiratory, thoracic and mediastinal disorders      | -   | -  | -       | -   | -  | -       | -         | -  | -       | -     | -  | -       | 4  | 4  | (1.97)  |

Number of events (e), number of participants with events (N) and percentage of participants with respective adverse events are indicated. Only adverse events reported by at least 2 participants in any group are listed in the by SOC display. The SOC total includes all AEs irrespective of frequency i.e., the number of events may not sum up to the SOC total number of AEs.

- indicates that no respective AE was documented. \* The PT “overweight” was reported in 2 (2.33%) of eHF and in 5 (6.02%) of LPeHF+Syn infants. The PT “overweight” was not reported in iPF LPiPF or BF infants. AE = adverse event; SAE = serious adverse event; PT = preferred term; SOC = system organ class.

**Table S9.** Plasma amino acid profile at month 4 (FAS).

| FAS            | Standard protein group |              |                   |              | Low protein group |              |                    |              | BF                |              |
|----------------|------------------------|--------------|-------------------|--------------|-------------------|--------------|--------------------|--------------|-------------------|--------------|
|                | eHF                    |              | iPF               |              | LPeHF+Syn         |              | LPiPF              |              |                   |              |
| N              | 66                     |              | 78                |              | 58                |              | 83                 |              | 166               |              |
| Alanine        | 496.0                  | 385.0, 641.0 | 382.0             | 323.0, 468.0 | 517.0             | 410.0, 590.0 | 360.0              | 301.0, 411.0 | 364.5             | 313.0, 429.0 |
| Arginine       | 91.2                   | 72.2, 112.0  | 92.9              | 75.1, 104.0  | 114.0             | 89.9, 140.0  | 82.4               | 68.6, 96.6   | 87.7              | 74.4, 102.0  |
| Aspartic acid  | 15.0                   | 12.2, 17.5   | 12.8              | 11.6, 14.5   | 11.9              | 10.3, 14.0   | 11.7               | 10.1, 13.0   | 11.5 <sup>b</sup> | 10.1, 13.6   |
| Asparagine     | 70.5 <sup>a</sup>      | 57.9, 87.7   | 55.8 <sup>s</sup> | 48.6, 62.6   | 71.9              | 56.7, 79.3   | 49.0               | 42.0, 57.4   | 46.0              | 38.8, 56.2   |
| Citrulline     | 23.3                   | 20.7, 29.0   | 22.2              | 18.6, 25.6   | 25.2              | 19.6, 32.8   | 21.2               | 17.4, 24.7   | 15.2              | 11.6, 19.5   |
| Cysteine       | 21.9                   | 11.8, 34.7   | 1.2 <sup>e</sup>  | 0.4, 2.0     | 25.6              | 20.5, 34.6   | 1.7 <sup>d</sup>   | 0.6, 3.3     | 5.7 <sup>c</sup>  | 1.0, 15.3    |
| Glutamine      | 671.5                  | 567.0, 813.0 | 559.0             | 482.0, 629.0 | 751.5             | 649.0, 876.0 | 558.5 <sup>f</sup> | 477.0, 611.0 | 662.0             | 558.0, 751.0 |
| Glutamine acid | 129.0 <sup>a</sup>     | 106.0, 154.0 | 139.5             | 118.0, 170.0 | 119.5             | 99.8, 148.0  | 142.0 <sup>f</sup> | 125.0, 169.0 | 152.5             | 124.0, 184.0 |
| Glycine        | 223.5                  | 175.0, 264.0 | 177.0             | 160.0, 196.0 | 243.5             | 192.0, 274.0 | 178.5 <sup>f</sup> | 156.0, 200.0 | 179.0             | 157.0, 213.0 |
| Histidine      | 106.0                  | 93.1, 128.0  | 88.8 <sup>s</sup> | 80.8, 99.9   | 96.7              | 85.6, 111.0  | 85.1               | 73.1, 94.5   | 94.5              | 80.0, 107.0  |
| Isoleucine     | 121.5                  | 91.3, 154.0  | 79.6              | 68.8, 89.1   | 94.9              | 77.4, 109.0  | 68.6               | 53.6, 83.2   | 64.0              | 51.4, 74.8   |
| Leucine        | 163.0                  | 131.0, 204.0 | 143.5             | 118.0, 159.0 | 149.5             | 122.0, 183.0 | 125.0 <sup>h</sup> | 99.0, 145.0  | 121.0             | 94.5, 135.0  |
| Lysine         | 313.0                  | 232.0, 371.0 | 190.5             | 167.0, 220.0 | 243.0             | 201.0, 274.0 | 191.0 <sup>f</sup> | 156.0, 221.0 | 166.0             | 134.0, 197.0 |
| Methionine     | 53.2 <sup>i</sup>      | 39.3, 61.7   | 34.6 <sup>s</sup> | 30.1, 39.1   | 34.0              | 28.5, 38.6   | 30.3               | 25.1, 35.8   | 24.8              | 20.3, 30.2   |
| Ornithine      | 85.6                   | 77.9, 99.2   | 87.4              | 75.1, 100.0  | 98.2              | 79.5, 119.0  | 80.1               | 65.7, 99.9   | 92.4              | 74.9, 111.0  |
| Phenylalanine  | 52.5                   | 42.8, 61.9   | 59.5              | 51.8, 64.6   | 71.5              | 59.1, 80.1   | 64.9               | 54.7, 76.8   | 48.2              | 41.4, 57.3   |
| Proline        | 302.0                  | 237.0, 346.0 | 268.0             | 223.0, 321.0 | 231.0             | 197.0, 249.0 | 212.5 <sup>f</sup> | 182.0, 252.0 | 268.5             | 223.0, 316.0 |
| Serine         | 178.5                  | 145.0, 218.0 | 133.5             | 121.0, 150.0 | 167.0             | 150.0, 198.0 | 135.0              | 121.0, 158.0 | 161.5             | 139.0, 187.0 |
| Threonine      | 325.0 <sup>a</sup>     | 247.0, 384.0 | 184.0             | 160.0, 231.0 | 258.0             | 209.0, 300.0 | 141.0              | 114.0, 167.0 | 140.0             | 115.0, 166.0 |
| Tryptophane    | 95.1                   | 65.6, 125.0  | 66.2              | 58.9, 73.7   | 105.0             | 87.4, 122.0  | 70.2               | 61.2, 80.8   | 65.8              | 55.9, 80.6   |
| Tyrosine       | 100.5                  | 83.3, 123.0  | 84.6              | 73.5, 100.0  | 100.5             | 84.2, 129.0  | 91.5 <sup>f</sup>  | 77.6, 105.0  | 80.9              | 66.1, 98.0   |
| Valine         | 266.0                  | 219.0, 307.0 | 232.0             | 212.0, 259.0 | 193.0             | 168.0, 214.0 | 203.0 <sup>h</sup> | 168.0, 228.0 | 176.0             | 150.0, 211.0 |

Depicted are medians and upper and lower quartile (μmol/L). Differences between eHF vs iPF and between LPeHF+Syn vs LPiPF P<0.05 (2-sided, vanElteren test adjusted for region) for all aminoacids except for eHF vs iPF: Glutamine acid, Ornithine, Phenylalanine and LPeHF+Syn vs LPiPF: Aspartic acid, Proline, Valine. <sup>a</sup> n=65, <sup>b</sup> n=165, <sup>c</sup> n=125, <sup>d</sup> n=52, <sup>e</sup> n=43, <sup>f</sup> n=82, <sup>s</sup> n=77, <sup>h</sup> n=81, <sup>i</sup> n=64.

**Table S10.** Stool frequency, color and consistency (FAS).

| FAS                                  |          |             | Standard protein group |        |     |        | Low protein group    |           |        |       |        |                      |     |        |
|--------------------------------------|----------|-------------|------------------------|--------|-----|--------|----------------------|-----------|--------|-------|--------|----------------------|-----|--------|
|                                      |          |             | eHF                    |        | iPF |        | p value <sup>1</sup> | LPeHF+Syn |        | LPiPF |        | p value <sup>1</sup> | BF  |        |
|                                      |          |             | n                      | (%)    | n   | (%)    |                      | n         | (%)    | n     | (%)    |                      | n   | (%)    |
| Age                                  | Category |             | n                      | (%)    | n   | (%)    | eHF vs. iPF          | n         | (%)    | n     | (%)    | LPeHF+Syn vs. LPiPF  | n   | (%)    |
| Total number of stools (categorized) | 1 month  | 1: <1/day   | 122                    | 47.84  | 32  | 12.31  | 0.0005               | 88        | 35.92  | 52    | 21.40  | 0.3959               | 58  | 9.68   |
|                                      |          | 2: 1-3/day  | 99                     | 38.82  | 152 | 58.46  |                      | 115       | 46.94  | 171   | 70.37  |                      | 175 | 29.22  |
|                                      |          | 3: 4-6/day  | 28                     | 10.98  | 63  | 24.23  |                      | 38        | 15.51  | 19    | 7.82   |                      | 278 | 46.41  |
|                                      |          | 4: 7-10/day | 6                      | 2.35   | 13  | 5.00   |                      | 4         | 1.63   | 1     | 0.41   |                      | 88  | 14.69  |
|                                      |          | 5: >10/day  | 0                      | 0.00   | 0   | 0.00   |                      | 0         | 0.00   | 0     | 0.00   |                      | 0   | 0.00   |
|                                      |          | Total       | 255                    | 100.00 | 260 | 100.00 |                      | 245       | 100.00 | 243   | 100.00 |                      | 599 | 100.00 |
|                                      | 2 months | 1: <1/day   | 107                    | 47.56  | 51  | 21.07  | 0.4211               | 144       | 64.86  | 62    | 26.72  | <.0001               | 130 | 24.39  |
|                                      |          | 2: 1-3/day  | 94                     | 41.78  | 165 | 68.18  |                      | 71        | 31.98  | 159   | 68.53  |                      | 216 | 40.53  |
|                                      |          | 3: 4-6/day  | 16                     | 7.11   | 23  | 9.50   |                      | 7         | 3.15   | 11    | 4.74   |                      | 155 | 29.08  |
|                                      |          | 4: 7-10/day | 8                      | 3.56   | 3   | 1.24   |                      | 0         | 0.00   | 0     | 0.00   |                      | 31  | 5.82   |
|                                      |          | 5: >10/day  | 0                      | 0.00   | 0   | 0.00   |                      | 0         | 0.00   | 0     | 0.00   |                      | 1   | 0.19   |
|                                      |          | Total       | 225                    | 100.00 | 242 | 100.00 |                      | 222       | 100.00 | 232   | 100.00 |                      | 533 | 100.00 |
|                                      | 3 months | 1: <1/day   | 116                    | 53.70  | 50  | 21.01  | <.0001               | 150       | 73.17  | 72    | 31.44  | <.0001               | 183 | 35.47  |
|                                      |          | 2: 1-3/day  | 88                     | 40.74  | 165 | 69.33  |                      | 49        | 23.90  | 155   | 67.69  |                      | 214 | 41.47  |
|                                      |          | 3: 4-6/day  | 9                      | 4.17   | 23  | 9.66   |                      | 6         | 2.93   | 2     | 0.87   |                      | 100 | 19.38  |
|                                      |          | 4: 7-10/day | 3                      | 1.39   | 0   | 0.00   |                      | 0         | 0.00   | 0     | 0.00   |                      | 19  | 3.68   |
|                                      |          | 5: >10/day  | 0                      | 0.00   | 0   | 0.00   |                      | 0         | 0.00   | 0     | 0.00   |                      | 0   | 0.00   |
|                                      |          | Total       | 216                    | 100.00 | 238 | 100.00 |                      | 205       | 100.00 | 229   | 100.00 |                      | 516 | 100.00 |
|                                      | 4 months | 1: <1/day   | 110                    | 51.64  | 51  | 21.70  | 0.0003               | 132       | 65.67  | 74    | 31.49  | <.0001               | 178 | 34.70  |
|                                      |          | 2: 1-3/day  | 83                     | 38.97  | 169 | 71.91  |                      | 68        | 33.83  | 157   | 66.81  |                      | 263 | 51.27  |
|                                      |          | 3: 4-6/day  | 16                     | 7.51   | 14  | 5.96   |                      | 1         | 0.50   | 4     | 1.70   |                      | 65  | 12.67  |
|                                      |          | 4: 7-10/day | 4                      | 1.88   | 1   | 0.43   |                      | 0         | 0.00   | 0     | 0.00   |                      | 7   | 1.36   |
|                                      |          | 5: >10/day  | 0                      | 0.00   | 0   | 0.00   |                      | 0         | 0.00   | 0     | 0.00   |                      | 0   | 0.00   |
|                                      |          | Total       | 213                    | 100.00 | 235 | 100.00 |                      | 201       | 100.00 | 235   | 100.00 |                      | 513 | 100.00 |
| Dominant consistency (3 categories)  | 1 month  | 1: watery   | 22                     | 9.44   | 1   | 0.39   | 0.4393               | 17        | 7.62   | 2     | 0.82   | 0.9466               | 124 | 21.20  |
|                                      |          | 2: hard     | 0                      | 0.00   | 10  | 3.92   |                      | 0         | 0.00   | 18    | 7.41   |                      | 1   | 0.17   |
|                                      |          | 3: others   | 211                    | 90.56  | 244 | 95.69  |                      | 206       | 92.38  | 223   | 91.77  |                      | 460 | 78.63  |
|                                      |          | Total       | 233                    | 100.00 | 255 | 100.00 |                      | 223       | 100.00 | 243   | 100.00 |                      | 585 | 100.00 |
|                                      | 2 months | 1: watery   | 20                     | 9.80   | 4   | 1.67   | 0.8003               | 10        | 5.24   | 2     | 0.87   | 0.6707               | 154 | 31.36  |
|                                      |          | 2: hard     | 1                      | 0.49   | 2   | 0.83   |                      | 0         | 0.00   | 8     | 3.48   |                      | 0   | 0.00   |
|                                      |          | 3: others   | 183                    | 89.71  | 234 | 97.50  |                      | 181       | 94.76  | 220   | 95.65  |                      | 337 | 68.64  |
|                                      |          | Total       | 204                    | 100.00 | 240 | 100.00 |                      | 191       | 100.00 | 230   | 100.00 |                      | 491 | 100.00 |
|                                      | 3 months | 1: watery   | 28                     | 14.58  | 7   | 2.97   | 0.6254               | 16        | 9.64   | 5     | 2.25   | 0.0192               | 104 | 22.76  |
|                                      |          | 2: hard     | 0                      | 0.00   | 2   | 0.85   |                      | 0         | 0.00   | 5     | 2.25   |                      | 0   | 0.00   |
|                                      |          | 3: others   | 164                    | 85.42  | 227 | 96.19  |                      | 150       | 90.36  | 212   | 95.50  |                      | 353 | 77.24  |

|                               |          |               |     |        |     |        |        |     |        |     |        |        |     |        |
|-------------------------------|----------|---------------|-----|--------|-----|--------|--------|-----|--------|-----|--------|--------|-----|--------|
|                               |          | <b>Total</b>  | 192 | 100.00 | 236 | 100.00 |        | 166 | 100.00 | 222 | 100.00 |        | 457 | 100.00 |
|                               | 4 months | 1: watery     | 25  | 13.16  | 9   | 3.86   |        | 18  | 10.59  | 8   | 3.46   |        | 103 | 22.29  |
|                               |          | 2: hard       | 0   | 0.00   | 2   | 0.86   |        | 0   | 0.00   | 9   | 3.90   |        | 0   | 0.00   |
|                               |          | 3: others     | 165 | 86.84  | 222 | 95.28  | 0.1377 | 152 | 89.41  | 214 | 92.64  | 0.3518 | 359 | 77.71  |
|                               |          | <b>Total</b>  | 190 | 100.00 | 233 | 100.00 |        | 170 | 100.00 | 231 | 100.00 |        | 462 | 100.00 |
| Dominant color (3 categories) | 1 month  | 1: normal     | 198 | 84.62  | 252 | 98.05  |        | 160 | 71.75  | 232 | 95.08  |        | 564 | 96.41  |
|                               |          | 2: green      | 36  | 15.38  | 5   | 1.95   |        | 62  | 27.80  | 12  | 4.92   |        | 21  | 3.59   |
|                               |          | 3: black/grey | 0   | 0.00   | 0   | 0.00   | 0.0382 | 1   | 0.45   | 0   | 0.00   | 0.0002 | 0   | 0.00   |
|                               |          | <b>Total</b>  | 234 | 100.00 | 257 | 100.00 |        | 223 | 100.00 | 244 | 100.00 |        | 585 | 100.00 |
|                               | 2 months | 1: normal     | 157 | 76.96  | 233 | 97.08  |        | 104 | 54.45  | 209 | 92.48  |        | 442 | 90.02  |
|                               |          | 2: green      | 46  | 22.55  | 6   | 2.50   |        | 87  | 45.55  | 17  | 7.52   |        | 49  | 9.98   |
|                               |          | 3: black/grey | 1   | 0.49   | 1   | 0.42   | 0.1040 | 0   | 0.00   | 0   | 0.00   | <.0001 | 0   | 0.00   |
|                               |          | <b>Total</b>  | 204 | 100.00 | 240 | 100.00 |        | 191 | 100.00 | 226 | 100.00 |        | 491 | 100.00 |
|                               | 3 months | 1: normal     | 144 | 75.00  | 212 | 91.38  |        | 64  | 38.55  | 211 | 95.91  |        | 415 | 91.21  |
|                               |          | 2: green      | 42  | 21.88  | 18  | 7.76   |        | 100 | 60.24  | 9   | 4.09   |        | 37  | 8.13   |
|                               |          | 3: black/grey | 6   | 3.13   | 2   | 0.86   | 0.3744 | 2   | 1.20   | 0   | 0.00   | <.0001 | 3   | 0.66   |
|                               |          | <b>Total</b>  | 192 | 100.00 | 232 | 100.00 |        | 166 | 100.00 | 220 | 100.00 |        | 455 | 100.00 |
|                               | 4 months | 1: normal     | 123 | 64.74  | 228 | 97.44  |        | 66  | 38.82  | 212 | 93.81  |        | 425 | 92.79  |
|                               |          | 2: green      | 65  | 34.21  | 6   | 2.56   |        | 102 | 60.00  | 11  | 4.87   |        | 32  | 6.99   |
|                               |          | 3: black/grey | 2   | 1.05   | 0   | 0.00   | 0.1545 | 2   | 1.18   | 3   | 1.33   | <.0001 | 1   | 0.22   |
|                               |          | <b>Total</b>  | 190 | 100.00 | 234 | 100.00 |        | 170 | 100.00 | 226 | 100.00 |        | 458 | 100.00 |

<sup>1</sup> two-sided p-value derived from Cochran-Mantel-Haenszel test adjusted for region.

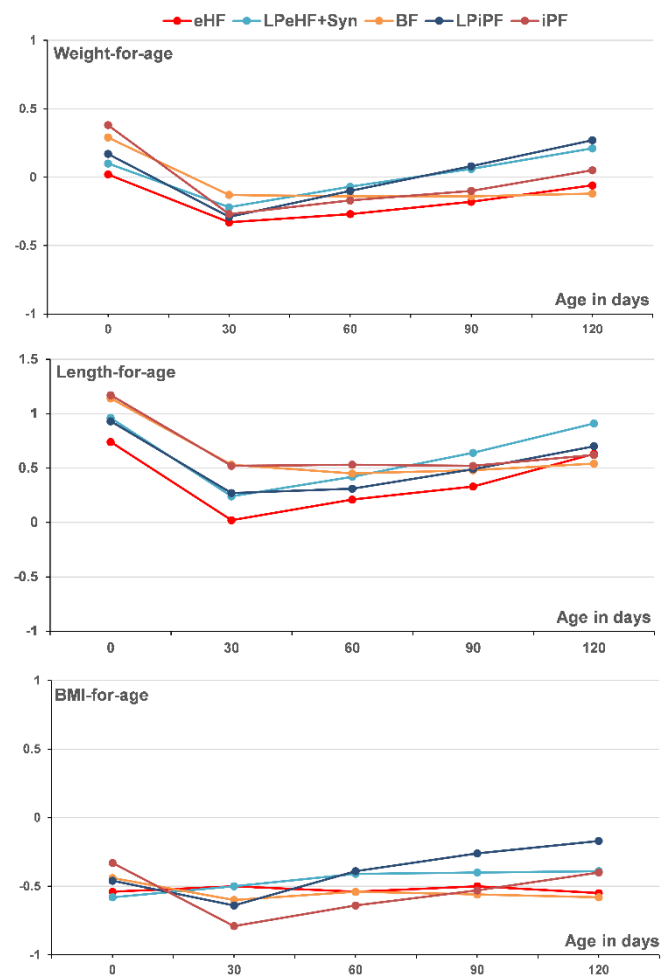

**Figure S1.** Anthropometric measurements (weight-for-age, length-for-age, and BMI-for-age) expressed as z scores (growth standards of the WHO) (FAS). z scores within -1 to 1 indicate an age-appropriate development. BMI = body mass index, WHO = World Health Organization.

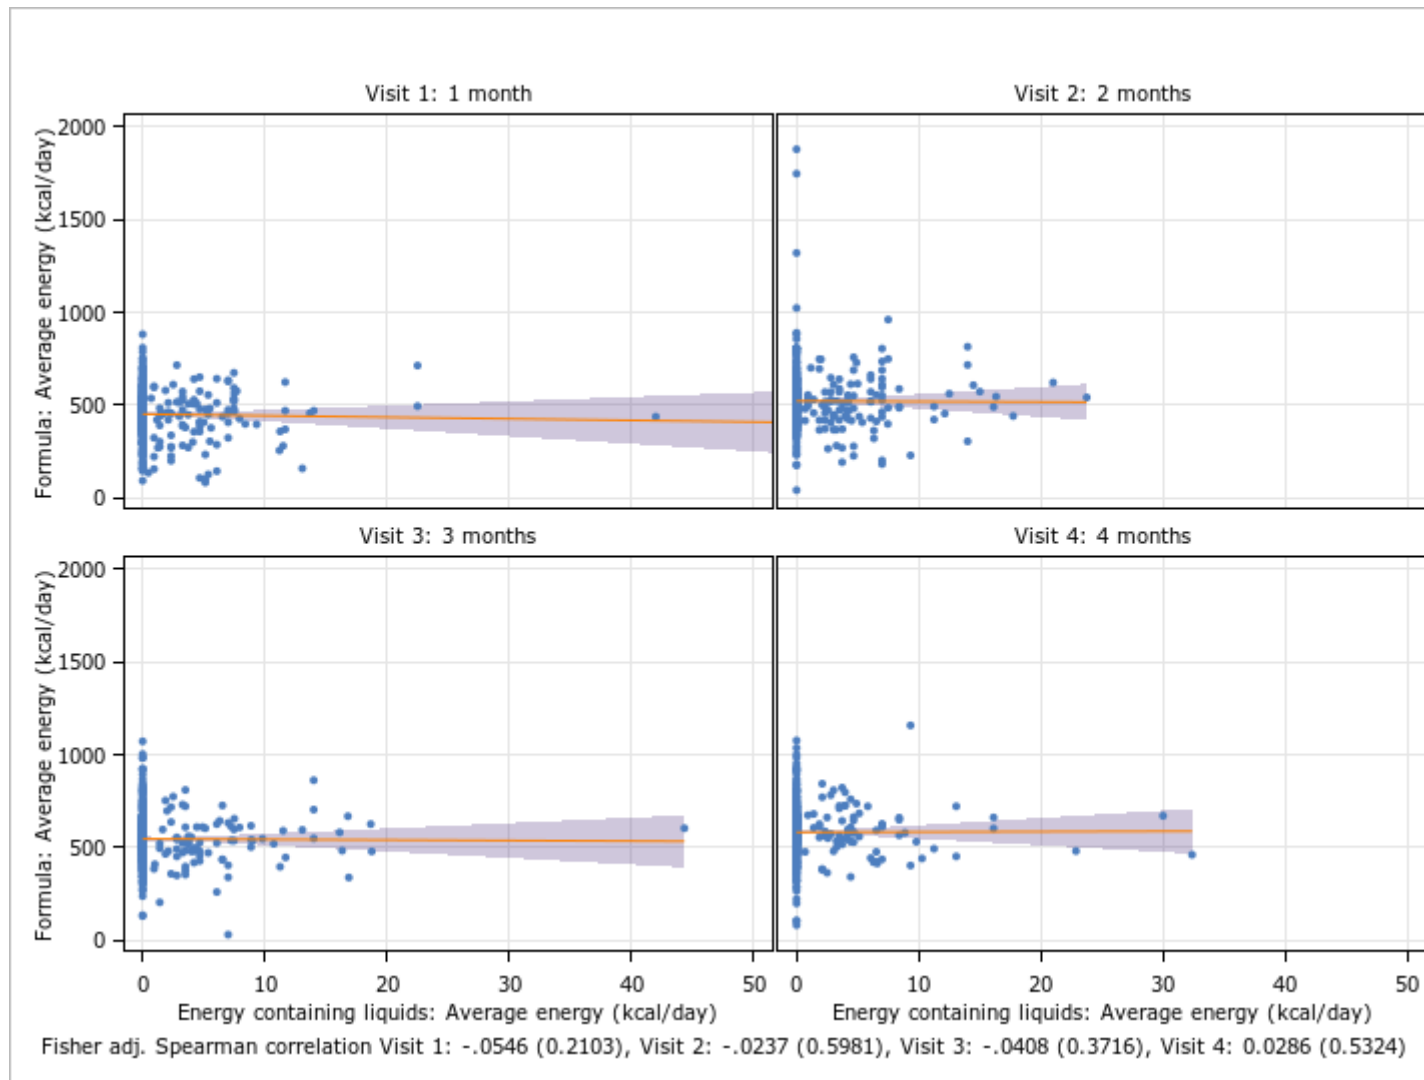

**Figure S2.** Scatterplots to correlate the impact of average study formula intake/day at 1, 2, 3, and 4 month(s) of life on average energy intake from liquids (FAS).

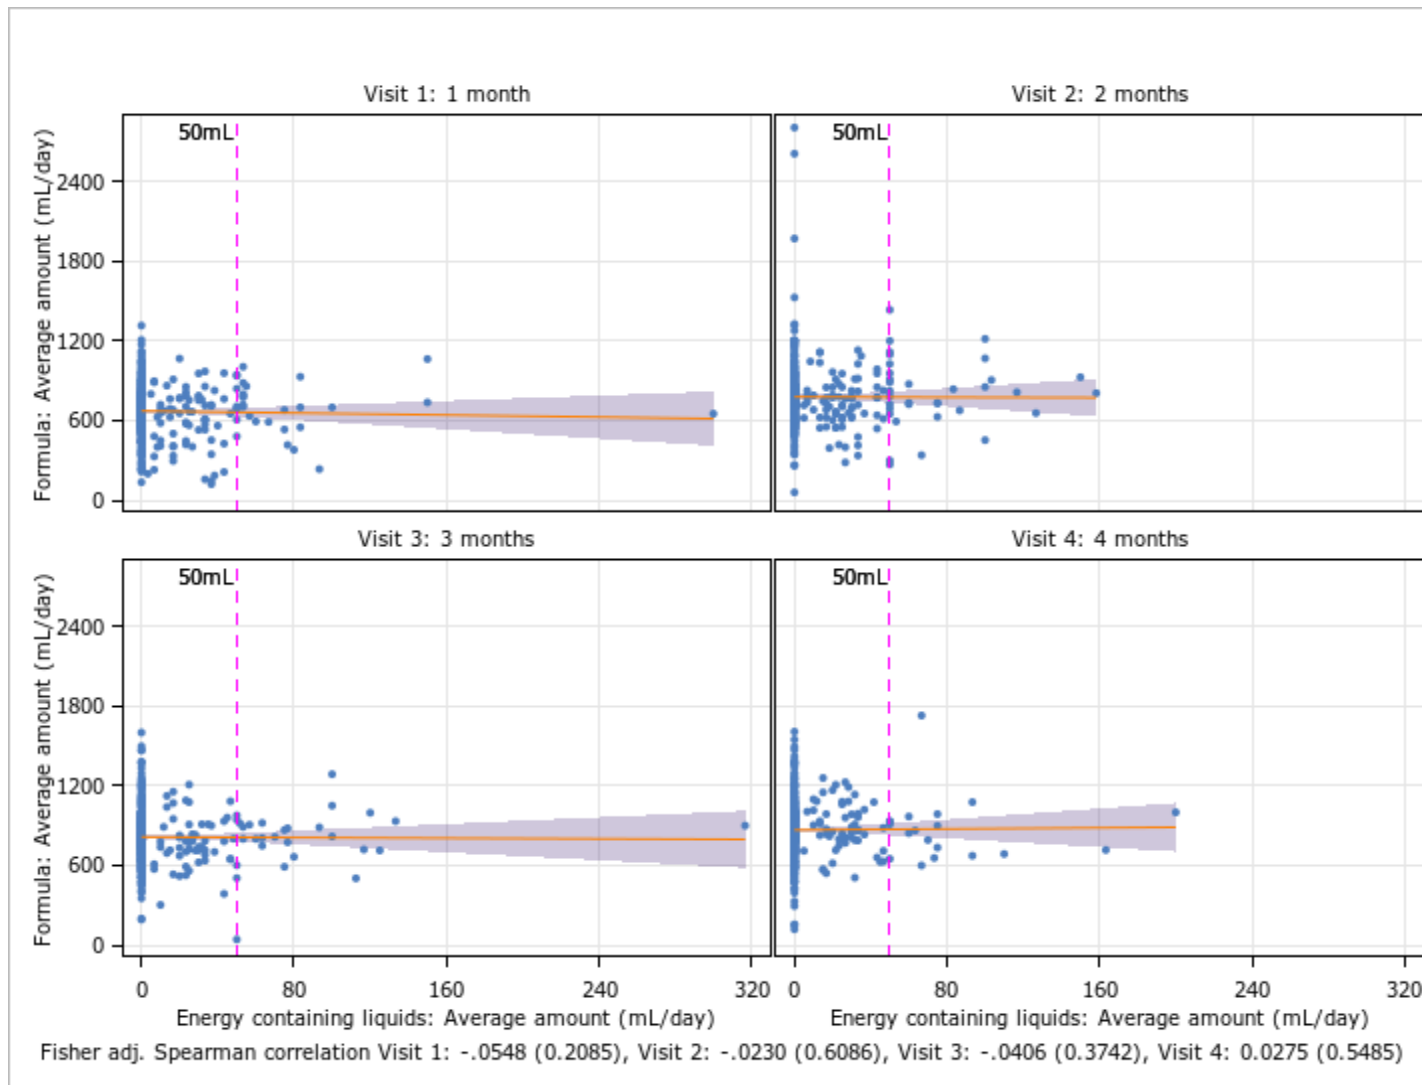

**Figure S3.** Scatterplots to correlate the impact of average amount of study formula intake/day at 1, 2, 3, and 4 month(s) of life on average amount of energy containing liquid intake (FAS).

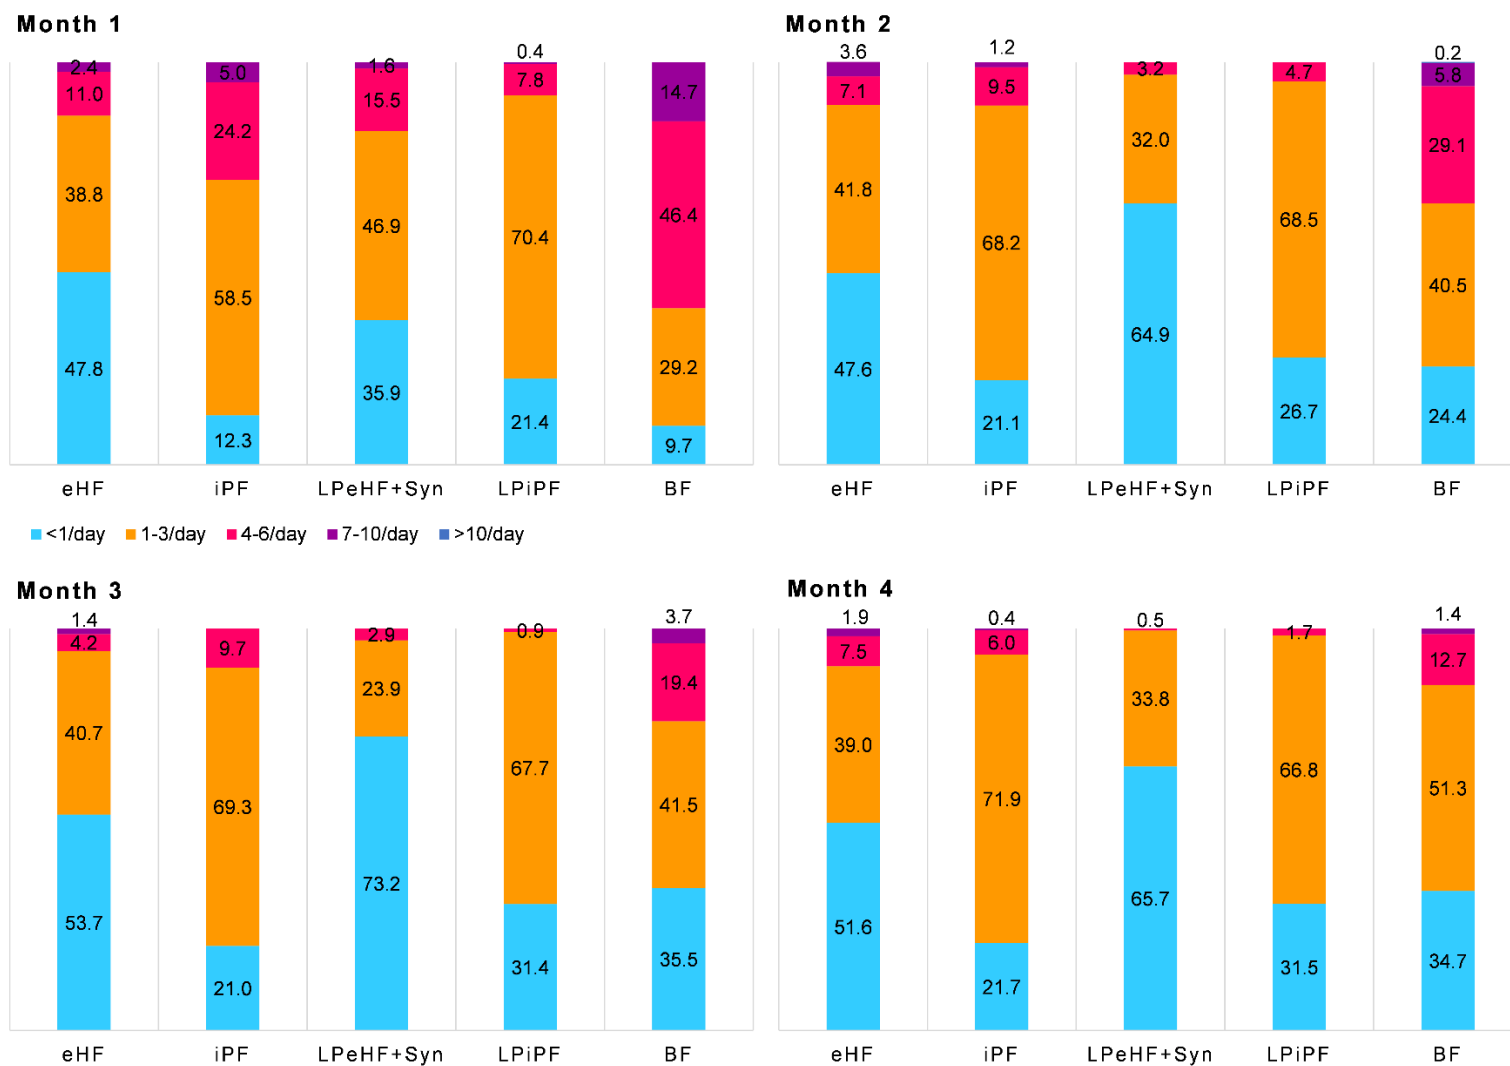

**Figure S4.** Stool frequency at 1, 2, 3, and 4 month(s) of life (FAS).

Values depicted represent percent of infants in the respective formula groups with the indicated number of stools/day. Significant differences between eHF vs iPF: at 1, 3, and 4 months; LPeHF+Syn vs LPiPF: at 2, 3, and 4 months.
